# Supplementary material for: Active Low-Density Polyethylene-Based Films by Incorporating α-Tocopherol in the Free State and Loaded in PLA Nanoparticles: A Comparative Study
Source: MDPI journal article supplement (doi:10.3390/foods13030475), 2024-02-02
Supplement: s1 [file s1]

**Supplementary Materials:**

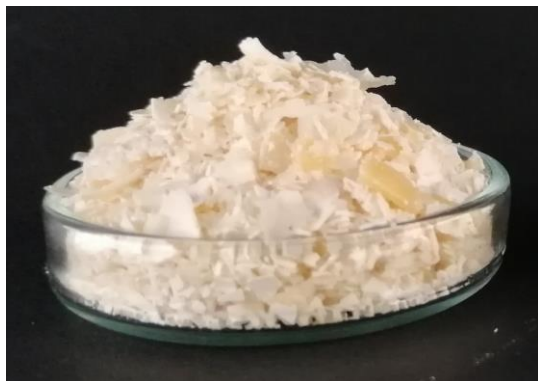

**(a)**

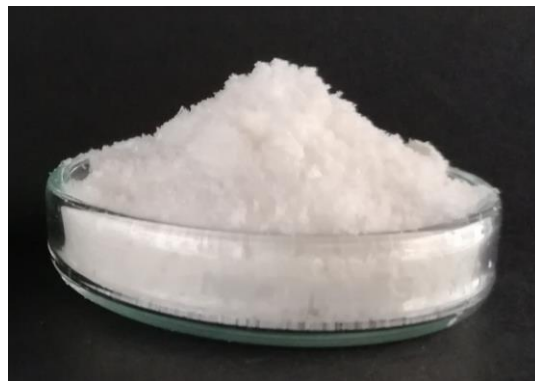

**(b)**

**Figure S1:** Image of PLA NPs loaded with  $\alpha$ -TOC dried by: A) oven and B) freeze drying.
